# Supplementary material for: Fabrication of Mucoadhesive Films Containing Pharmaceutical Ionic Liquid and Eudragit Polymer Using Pressure-Assisted Microsyringe-Type 3D Printer for Treating Oral Mucositis
Source: MDPI journal article supplement (doi:10.3390/pharmaceutics14091930), 2022-09-13
Supplement: s1 [file s1]

**Table S1.** Surface tension, density, and  $\gamma_{SL}$  of IL-loaded printer inks containing different Eudragit polymers. Information on the printer inks is shown in Table 1 and in Materials and Methods. The data on surface tension represent the mean  $\pm$  standard deviation of five measurements. ND \*: Not determined. ND †: No data available.

| Formulation                        | IL                | A       | B                 | C                 | D                 | E                 | F                 | Supporting Layer  | Water             |
|------------------------------------|-------------------|---------|-------------------|-------------------|-------------------|-------------------|-------------------|-------------------|-------------------|
| Surface Tension<br>(mN/m)          | 33.3<br>$\pm 0.6$ | ND *    | 34.9<br>$\pm 0.6$ | 35.4<br>$\pm 3.2$ | 32.9<br>$\pm 0.6$ | 34.8<br>$\pm 0.5$ | 32.7<br>$\pm 0.1$ | 19.8<br>$\pm 5.8$ | 70.7<br>$\pm 0.8$ |
| Density (g/cm <sup>3</sup> )       | 1.01766           | 1.02419 | 1.03106           | 1.05111           | 0.99193           | 1.05837           | 1.00968           | 1.02592           | 0.99795           |
| $\gamma_{SL}$ (mJ/m <sup>2</sup> ) | 7.9               | ND †    | ND †              | 24.0              | 17.5              | 20.6              | 22.0              | 32.6              | 42.6              |
